# Supplementary material for: How medical dominance and interprofessional conflicts undermine patient-centred care in hospitals: historical analysis and multiple embedded case study in Morocco
Source: PubMed Central journal article supplement — BMJ Glob Health. 2021 Jul 14;6(7):e006140. doi: 10.1136/bmjgh-2021-006140 (PMC8280911; doi:10.1136/bmjgh-2021-006140), 2021-07-14
Supplement: bmjgh-2021-006140supp004.pdf [file bmjgh-2021-006140supp004.pdf]

**Supplementary file 4 : sociodemographic characteristics case 1**

| Code    | Age   | Managerial function  | Professional profile          | Genre  |
|---------|-------|----------------------|-------------------------------|--------|
| NHMH 1  | 41-50 | Senior Manager       | Doctor (General Practitioner) | Female |
| NHMH 2  | 31-40 | Non Manager          | Nurse anesthesiologist        | Male   |
| NHMH 3  | 41-50 | Non Manager          | Doctor (General Practitioner) | Male   |
| NHMH 4  | 20-30 | Non Manager          | Nurse                         | Female |
| NHMH 5  | 31-40 | Intermediate Manager | Pharmacist                    | Female |
| NHMH 6  | 41-50 | Non Manager          | Doctor (Specialist)           | Male   |
| NHMH 7  | 41-50 | Senior Manager       | Doctor (General Practitioner) | Male   |
| NHMH 8  | 31-40 | Operational Manager  | MidWife                       | Female |
| NHMH 9  | 51-63 | Operational Manager  | Nurse                         | Female |
| NHMH 10 | 51-63 | Non Manager          | Doctor (Specialist)           | Male   |
| NHMH 11 | 41-50 | Non Manager          | Doctor (Specialist)           | Male   |
| NHMH 12 | 31-40 | Operational Manager  | Administrator                 | Female |
| NHMH 13 | 20-30 | Non Manager          | Nurse                         | Female |
| NHMH 14 | 31-40 | Non Manager          | Administrator ( former nurse) | Female |
| NHMH 15 | 31-40 | Non Manager          | Administrator ( was a nurse)  | Male   |
| NHMH 16 | 51-63 | Operational Manager  | Doctor (General Practitioner) | Female |
| NHMH 17 | 20-30 | Operational Manager  | Nurse                         | Male   |
| NHMH 18 | 20-30 | Non Manager          | Nurse                         | Female |
| NHMH 19 | 31-40 | Non Manager          | Laboratory technician         | Female |
| NHMH 20 | 31-40 | Non Manager          | Nurse anesthesiologist        | Female |
| NHMH 21 | 31-40 | Non Manager          | rAdiology technician          | Female |
| NHMH 22 | 31-40 | Non Manager          | Nurse                         | Female |
| NHMH 23 | 20-30 | Non Manager          | Nurse (Operating theater)     | Male   |
| NHMH 24 | 20-30 | Non Manager          | Nurse anesthesiologist        | Female |
| NHMH 25 | 51-63 | Intermediate Manager | Doctor (General Practitioner) | Male   |
| NHMH 26 | 41-50 | Non Manager          | Doctor (Specialist)           | Female |
| NHMH 27 | 31-40 | Non Manager          | Doctor (General Practitioner) | Female |
| NHMH 28 | 51-63 | Non Manager          | Doctor (Specialist)           | Female |
| NHMH 29 | 51-63 | Non Manager          | Cashier (Technical staff)     | Female |
| NHMH30  | 41-50 | Senior Manager       | Nurse                         | Male   |
| NHMH31  | 41-50 | Intermediate Manager | Doctor (General Practitioner) | Female |
| NHMH32  | 41-50 | Senior Manager       | Doctor (Specialist)           | Male   |
