# Supplementary material for: How medical dominance and interprofessional conflicts undermine patient-centred care in hospitals: historical analysis and multiple embedded case study in Morocco
Source: PubMed Central journal article supplement — BMJ Glob Health. 2021 Jul 14;6(7):e006140. doi: 10.1136/bmjgh-2021-006140 (PMC8280911; doi:10.1136/bmjgh-2021-006140), 2021-07-14
Supplement: bmjgh-2021-006140supp005.pdf [file bmjgh-2021-006140supp005.pdf]

**Supplementary file 5 sociodemographic characteristic of participants from EJMh hospital**

| Code    | Age   | Managerial function  | Professional profile           | Genre  |
|---------|-------|----------------------|--------------------------------|--------|
| EJMh 1  | 41-50 | Senior Manager       | Nurse                          | Female |
| EJMh 2  | 41-50 | Senior Manager       | Doctor (General Practitioner)  | Male   |
| EJMh 3  | 31-40 | Intermediate Manager | Administrator                  | Male   |
| EJMh 4  | 51-63 | Non-Manager          | Pharmacy technician            | Female |
| EJMh 5  | 31-40 | Non-Manager          | Pharmacist                     | Female |
| EJMh 6  | 31-40 | Non-Manager          | Pharmacist                     | Female |
| EJMh 7  | 51-63 | Senior Manager       | Doctor (General Practitioner)  | Male   |
| EJMh 8  | 51-63 | Non-Manager          | Administrator                  | Male   |
| EJMh 9  | 41-50 | Non-Manager          | Doctor (General Practitioner)  | Male   |
| EJMh 10 | 41-50 | Non-Manager          | Doctor (General Practitioner)  | Female |
| EJMh 11 | 41-50 | Non-Manager          | Doctor (Specialist)            | Male   |
| EJMh 12 | 31-40 | Intermediate Manager | Laboratory technician          | Female |
| EJMh 13 | 51-63 | Intermediate Manager | Doctor (Specialist)            | Male   |
| EJMh 14 | 31-40 | Intermediate Manager | Nurse                          | Female |
| EJMh 15 | 41-50 | Non-Manager          | Technician (Technical staff)   | Female |
| EJMh 16 | 41-50 | Non-Manager          | Administrator (former nurse)   | Female |
| EJMh 17 | 41-50 | Non-Manager          | Administrator (former nurse)   | Female |
| EJMh 18 | 51-63 | Non-Manager          | technician (Technical staff)   | Female |
| EJMh 19 | 20-30 | Non-Manager          | Technician (Technical staff)   | Female |
| EJMh 20 | 51-63 | Non-Manager          | Administrator                  | Female |
| EJMh 21 | 41-50 | Non-Manager          | Administrator (former midwife) | Female |
| EJMh 22 | 51-63 | Non-Manager          | Administrator                  | Female |
| EJMh 23 | 51-63 | Intermediate Manager | Nurse                          | Male   |
| EJMh 24 | 31-40 | Non-Manager          | Nurse                          | Female |
| EJMh 25 | 31-40 | Intermediate Manager | Pharmacist                     | Male   |
| EJMh 26 | 41-50 | Non-Manager          | Doctor (Specialist)            | Male   |
| EJMh 27 | 51-63 | Non-Manager          | Doctor (Specialist)            | Female |
| EJMh 28 | 51-63 | Non-Manager          | Doctor (Specialist)            | Male   |
| EJMh 29 | 51-63 | Non-Manager          | Doctor (General Practitioner)  | Male   |
| EJMh 30 | 31-40 | Non-Manager          | Doctor (Specialist)            | Male   |
| EJMh 31 | 51-63 | Non-Manager          | Doctor (Specialist)            | Male   |

|         |       |                      |                               |        |
|---------|-------|----------------------|-------------------------------|--------|
| EJMH 32 | 51-63 | Operational Manager  | Radiology technician          | Female |
| EJMH 33 | 20-30 | Non-Manager          | Nurse                         | Female |
| EJMH 34 | 20-30 | Non-Manager          | Midwife                       | Female |
| EJMH 35 | 51-63 | Non-Manager          | Laboratory technician         | Female |
| EJMH 36 | 31-40 | Non-Manager          | Nurse anaesthesiologist       | Female |
| EJMH 37 | 51-63 | Non-Manager          | Auxiliary Nurse               | Female |
| EJMH 38 | 31-40 | Non-Manager          | Doctor (General Practitioner) | Female |
| EJMH 39 | 31-40 | Non-Manager          | Nurse                         | Male   |
| EJMH 40 | 51-63 | Operational Manager  | Nurse                         | Male   |
| EJMH 41 | 51-63 | Non-Manager          | Nurse                         | Male   |
| EJMH 42 | 51-63 | Intermediate Manager | Doctor (General Practitioner) | Male   |
| EJMH 43 | 51-63 | Senior Manager       | Administrator                 | Female |
