# Supplementary material for: How medical dominance and interprofessional conflicts undermine patient-centred care in hospitals: historical analysis and multiple embedded case study in Morocco
Source: PubMed Central journal article supplement — BMJ Glob Health. 2021 Jul 14;6(7):e006140. doi: 10.1136/bmjgh-2021-006140 (PMC8280911; doi:10.1136/bmjgh-2021-006140), 2021-07-14
Supplement: bmjgh-2021-006140supp006.pdf [file bmjgh-2021-006140supp006.pdf]

**Supplementary file 6 sociodemographic characteristics of respondents from RKMH hospital**

| Code    | Age   | Managerial function | Professional profile          | Genre  |
|---------|-------|---------------------|-------------------------------|--------|
| RKMH 1  | 41-50 | Non-Manager         | Doctor (General Practitioner) | Male   |
| RKMH 2  |       | Intermediate        |                               |        |
|         | 41-50 | Manager             | Pharmacist                    | Male   |
| RKMH 3  | 41-50 | Non-Manager         | Doctor (Specialist)           | Female |
| RKMH 4  | 51-63 | Operational Manager | Nurse                         | Female |
| RKMH 5  | 41-50 | Operational Manager | Administrator                 | Male   |
| RKMH 6  | 51-63 | Senior Manager      | Nurse                         | Male   |
| RKMH 7  | 51-63 | Operational Manager | Nurse                         | Male   |
| RKMH 8  | 51-63 | Operational Manager | Technician (Technical staff)  | Female |
| RKMH 9  | 41-50 | Non-Manager         | Cashier (Technical staff)     | Male   |
| RKMH 10 | 31-40 | Non-Manager         | Nurse                         | Male   |
| RKMH 11 | 20-30 | Non-Manager         | Nurse                         | Female |
| RKMH 12 | 20-30 | Non-Manager         | Nurse anesthesiologist        | Female |
| RKMH 13 | 20-30 | Non-Manager         | Radiology technician          | Female |
| RKMH 14 | 31-40 | Non-Manager         | Midwife                       | Female |
| RKMH 15 | 51-63 | Senior Manager      | Administrator                 | Male   |
| RKMH 16 | 41-50 | Non-Manager         | Doctor (Specialist)           | Female |
| RKMH 17 | 20-30 | Non-Manager         | Radiology technician          | Female |
| RKMH 18 | 20-30 | Non-Manager         | Nurse anesthesiologist        | Male   |
| RKMH 19 | 31-40 | Non-Manager         | Nurse                         | Male   |
| RKMH 20 | 51-63 | Non-Manager         | Nurse                         | Female |
| RKMH 21 | 31-40 | Non-Manager         | Midwife                       | Female |
| RKMH 22 | 31-40 | Non-Manager         | technician (Technical staff)  | Male   |
| RKMH 23 | 41-50 | Senior Manager      | Doctor (General Practitioner) | Male   |
| RKMH 24 | 31-40 | Operational Manager | Nurse                         | Male   |
| RKMH 25 | 41-50 | Non-Manager         | Technician (Technical staff)  | Male   |
| RKMH 26 | 41-50 | Non-Manager         | technician (Technical staff)  | Male   |
