# Supplementary material for: How medical dominance and interprofessional conflicts undermine patient-centred care in hospitals: historical analysis and multiple embedded case study in Morocco
Source: PubMed Central journal article supplement — BMJ Glob Health. 2021 Jul 14;6(7):e006140. doi: 10.1136/bmjgh-2021-006140 (PMC8280911; doi:10.1136/bmjgh-2021-006140), 2021-07-14
Supplement: bmjgh-2021-006140supp007.pdf [file bmjgh-2021-006140supp007.pdf]

**Supplementary file 7 socio demographic characteristics from SMBA Hospital**

| Code    | Age   | Managerial function | Professional profile                    | Genre  |
|---------|-------|---------------------|-----------------------------------------|--------|
| SMBA 1  | 51-63 | Non Manager         | Nurse                                   | Male   |
| SMBA 2  | 31-40 | Non Manager         | Nurse                                   | Female |
| SMBA 3  | 41-50 | Senior Manager      | Doctor (General Practitioner)           | Male   |
| SMBA 4  | 31-40 | Senior Manager      | Nurse (Filling administrative position) | Male   |
| SMBA 5  | 51-63 | Senior Manager      | Nurse                                   | Male   |
| SMBA 6  | 41-50 | Line Manager        | Midwife                                 | Female |
| SMBA 7  | 51-63 | Non Manager         | Nurse                                   | Female |
| SMBA 8  | 51-63 | Non Manager         | Nurse                                   | Female |
| SMBA 9  | 51-63 | Non Manager         | Nurse                                   | Female |
| SMBA 10 | 51-63 | Non Manager         | Nurse                                   | Female |
| SMBA 11 | 20-30 | Non Manager         | Midwife                                 | Female |
| SMBA 12 | 31-40 | Non Manager         | Nurse anaesthesiologist                 | Female |
| SMBA 13 | 31-40 | Non Manager         | Nurse                                   | Female |
| SMBA 14 | 31-40 | Non Manager         | Doctor (General Practitioner)           | Female |
| SMBA 15 | 31-40 | Non Manager         | Doctor (Specialist)                     | Female |
| SMBA 16 | 41-50 | Non Manager         | Doctor (General Practitioner)           | Male   |
| SMBA 17 | 51-63 | Line Manager        | Nurse                                   | Male   |
| SMBA 18 | 41-50 | Line Manager        | Doctor (General Practitioner)           | Male   |
| SMBA 19 | 41-50 | Non Manager         | Doctor (Specialist)                     | Female |
| SMBA 20 | 41-50 | Non Manager         | Doctor (General Practitioner)           | Male   |
| SMBA 21 | 51-63 | Non Manager         | Technician (Technical staff)            | Male   |
| SMBA 22 | 41-50 | Non Manager         | Technician (Technical staff)            | Male   |
| SMBA 23 | 51-63 | Line Manager        | Doctor (General Practitioner)           | Male   |
| SMBA 24 | 51-63 | Line Manager        | Nurse                                   | Female |
| SMBA 25 | 31-40 | Operational Manager | Nurse                                   | Male   |
| SMBA 26 | 31-40 | Non Manager         | technician (Technical staff)            | Male   |
| SMBA 27 | 41-50 | Non Manager         | Technician (Technical staff)            | Female |
| SMBA 28 | 41-50 | Non Manager         | Administrator                           | Male   |
| SMBA 29 | 31-40 | Non Manager         | Technician (Technical staff)            | Male   |
| SMBA 30 | 31-40 | Non Manager         | Cashier (Technical staff)               | Female |

|         |       |                     |                               |        |
|---------|-------|---------------------|-------------------------------|--------|
| SMBA 31 | 51-63 | Non Manager         | technician (Technical staff)  | Female |
| SMBA 32 | 41-50 | Senior Manager      | Doctor (Specialist)           | Male   |
| SMBA 33 | 31-40 | Non Manager         | Pharmacist                    | Female |
| SMBA 34 | 20-30 | Non Manager         | Pharmacy technician           | Female |
| SMBA 35 | 51-63 | Non Manager         | Nurse                         | Female |
| SMBA 36 | 41-50 | Operational Manager | Administrator                 | Male   |
| SMBA 37 | 51-63 | Non Manager         | Nurse (Operating theatre)     | Female |
| SMBA 38 | 31-40 | Non Manager         | Nurse                         | Female |
| SMBA 39 | 31-40 | Non Manager         | Nurse                         | Male   |
| SMBA 40 | 31-40 | Operational Manager | Doctor (Specialist)           | Male   |
| SMBA 41 | 20-30 | Non Manager         | Psychiatric nurse             | Male   |
| SMBA 42 | 31-40 | Non Manager         | Doctor (Specialist)           | Female |
| SMBA 43 | 31-40 | Non Manager         | Doctor (Specialist)           | Female |
| SMBA 44 | 31-40 | Non Manager         | Doctor (General Practitioner) | Female |
| SMBA 45 | 51-63 | Non Manager         | Doctor (General Practitioner) | Male   |
