# Supplementary material for: How medical dominance and interprofessional conflicts undermine patient-centred care in hospitals: historical analysis and multiple embedded case study in Morocco
Source: PubMed Central journal article supplement — BMJ Glob Health. 2021 Jul 14;6(7):e006140. doi: 10.1136/bmjgh-2021-006140 (PMC8280911; doi:10.1136/bmjgh-2021-006140), 2021-07-14
Supplement: bmjgh-2021-006140supp008.pdf [file bmjgh-2021-006140supp008.pdf]

**Supplementary file 8: Codes and their frequency**

|                                                     | <b>Senior Manager</b> | <b>Intermediate Manager</b> | <b>Operational Manager</b> | <b>Healthworkers( doctors/nurse)</b> |
|-----------------------------------------------------|-----------------------|-----------------------------|----------------------------|--------------------------------------|
| 1 : Discretionary Power within Management Actions   | 7                     | 4                           | 6                          | 29                                   |
| 2 : Discretionary Power within Patient Consultation | 0                     | 2                           | 8                          | 11                                   |
| 3 : Discretionary Power within Service Delivery     | 22                    | 24                          | 4                          | 26                                   |
| 4 : Discretionary Power within Workplace            | 200                   | 112                         | 134                        | 337                                  |
| 5 : Informal power                                  | 36                    | 9                           | 10                         | 17                                   |
| 6 : Repulsion to clientelism                        | 2                     | 14                          | 13                         | 34                                   |
| 7 : Limited autonomy of hospitals                   | 30                    | 20                          | 32                         | 55                                   |
| 8 : Leaders between the devil and the deep sea      | 4                     | 0                           | 5                          | 3                                    |
| 9 : Limited power of formal authority               | 10                    | 16                          | 23                         | 44                                   |
| 10 : Political membership of managers               | 6                     | 2                           | 19                         | 17                                   |
| 11 : Influence of policy actors                     | 18                    | 16                          | 11                         | 23                                   |
| 12 : Interaction with experts                       | 11                    | 4                           | 2                          | 4                                    |
| 13 : Influence of provincial health officers        | 4                     | 7                           | 4                          | 10                                   |
| 14 : Nepotism                                       | 30                    | 13                          | 9                          | 45                                   |
| 15 : High turnover of hospital directors            | 4                     | 17                          | 13                         | 32                                   |
